# Supplementary material
Source: PubMed Central journal article supplement (PMC10972628)
Supplement: zwad348_supplementary_data.pdf [file zwad348_supplementary_data.pdf]

2000 - 2010

Patients receiving anthracyclines:  
N = 3081

Exclusion:

- No blood sample available, n=1588
- HER2 treatment, n=264
- Metastatic disease at baseline, previous oncological disease, n=236

Eligible for EMR review:  
N = 993

2011 - 2018

Patients receiving anthracyclines:  
N = 2028

Exclusion:

- No blood sample available, n=652
- HER2 treatment, n=399
- Metastatic disease at baseline, previous oncological disease, n=187

Eligible for EMR review:  
N = 790

EMR reviewed:  
N = 1783

Exclusion:

- No baseline or follow-up TTE, n=582
- Metastatic disease or second primary malignancy during follow-up, n=167
- Significant comorbidity, n=13
- HER2 treatment, n=17
- Preexisting cardiovascular disease, n=10
- Male, n=5

Eligible for current analysis:  
N = 989

## Causes of LV decline

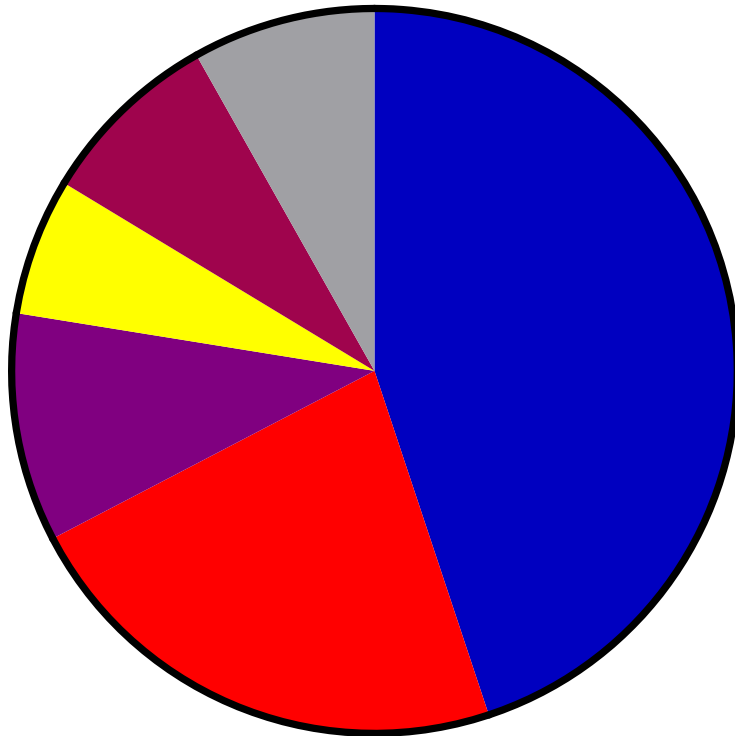

- 45% Anthracycline-induced cardiomyopathy (n=22)
- 22% Ischemic heart disease (n=11)
- 10% Tachycardiomyopathy (n=5)
- 6% Valvular heart disease (n=3)
- 8% Other (n=4)
- 8% Unknown (n=4)

**Total=49**

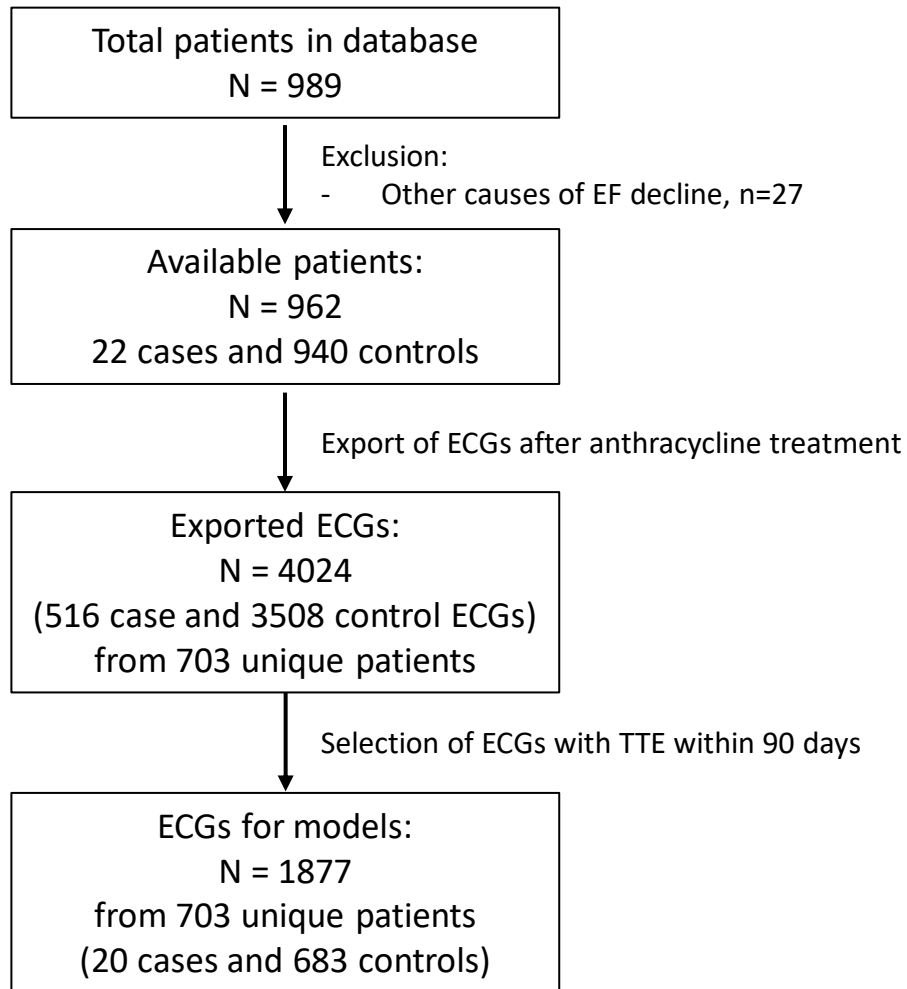

- 313 ECGs from the 20 case patients
- 1564 ECGs from 683 control patients
- 156 ECGs mapped to TTEs that showed  $EF \leq 35\%$
- 221 ECGs mapped to TTEs with  $EF \leq 40\%$
- 261 ECGs mapped to TTEs with  $EF \leq 45\%$
- 271 ECGs mapped to TTEs with  $EF < 50\%$

**Supplementary Table 1: Baseline characteristics total cohort**

| <u>Baseline characteristics</u>                     | <u>Total population</u><br>(n=989)          | <u>Controls</u><br>(n=940)                     | <u>Cases</u><br>(n=22)                     | <u>p-value</u> |
|-----------------------------------------------------|---------------------------------------------|------------------------------------------------|--------------------------------------------|----------------|
| Age<br>(at February 1st 2023, mean<br>± SD)         | 62.38 years<br>(± 11.21)                    | 62.04 years<br>(± 11.22)                       | 67.18 years<br>(± 8.51)                    | 0.02           |
| <b>Tumor characteristics</b>                        |                                             |                                                |                                            |                |
| - ER positivity                                     | 69.2% (n=681)                               | 68.8% (n=647)                                  | 77.3% (n=17)                               | 0.49           |
| - PR positivity                                     | 60.1% (n=596)                               | 60.4% (n=568)                                  | 59.1% (n=13)                               | >0.99          |
| <i>Pathological stage</i><br>(data available n=748) |                                             |                                                |                                            | 0.07           |
| - IA/IB                                             | 11.9% (n=89)/4%<br>(n=30)                   | 11.9%<br>(n=84)/4.1%<br>(n=29)                 | 21.4%<br>(n=3)/0% (n=0)                    |                |
| - IIA/IIB                                           | 28.9%<br>(n=216)/30.1%<br>(n=225)           | 29%<br>(n=205)/30.2%<br>(n=214)                | 14.3%<br>(n=2)/28.6%<br>(n=4)              |                |
| - IIIA/IIIB/IIIC                                    | 19%<br>(n=142)/0.3%<br>(n=2)/5.3%<br>(n=40) | 19.1%<br>(n=135)/0.1%<br>(n=1), 5.1%<br>(n=36) | 14.3% (n=2)/<br>0%<br>(n=0)/21.4%<br>(n=3) |                |
| - IV                                                | 0.4% (n=3)                                  | 0.4% (n=3)                                     | 0% (n=0)                                   |                |
| <i>grade</i>                                        |                                             |                                                |                                            | 0.42           |
| - 1                                                 | 3.9% (n=39)                                 | 3.8% (n=36)                                    | 4.5% (n=1)                                 |                |

|                                                      |                      |                      |                      |                 |
|------------------------------------------------------|----------------------|----------------------|----------------------|-----------------|
| - 2                                                  | 40.4% (n=400)        | 41% (n=385)          | 27.3% (n=6)          |                 |
| - 3                                                  | 54.9% (n=543)        | 54.7% (n=514)        | 68.2% (n=15)         |                 |
| <b>Setting</b>                                       |                      |                      |                      | 0.80            |
| - Adjuvant                                           | 77.6% (n=767)        | 76.9% (n=723)        | 81.8% (n=18)         |                 |
| - Neoadjuvant                                        | 22.4% (n=222)        | 23.1% (n=217)        | 18.2% (n=4)          |                 |
| <b>Oncological treatment</b>                         |                      |                      |                      | 0.03            |
| - FEC (5FU, Epirubicin, Cyclophosphamide)            | 69.3% (n=685)        | 68.2% (n=641)        | 90.9% (n=20)         |                 |
| - EC (Epirubicin, Cyclophosphamide)                  | 29.5% (n=292)        | 30.6% (n=288)        | 9% (n=2)             |                 |
| - AC (Adriamycin, Cyclophosphamide)                  | 1% (n=10)            | 1% (n=9)             | 0% (n=0)             |                 |
| - CAF (Cyclophosphamide, Adriamycin, 5FU)            | 0.2% (n=2)           | 0.2% (n=2)           | 0% (n=0)             |                 |
| <b>Number of cycles with anthracyclines received</b> | <b>3.86 (± 1.16)</b> | <b>3.82 (± 1.12)</b> | <b>5.05 (± 1.43)</b> | <b>&lt;0.01</b> |
| <b>Radiotherapy</b>                                  | <b>94.5% (n=935)</b> | <b>95% (n=888)</b>   | <b>95.5% (n=21)</b>  | <b>&gt;0.99</b> |
| <b>Cardiovascular risk factors</b>                   |                      |                      |                      |                 |
| - smoking (data available n=885)                     | 39.2% (n=348)        | 38.9% (n=326)        | 47.7% (n=10)         | 0.50            |
| - hypertension (data available n=988)                | 24.6% (n=243)        | 24.2% (n=227)        | 13.6% (n=3)          | 0.32            |
| - diabetes (data available n=989)                    | 4.6% (n=45)          | 4.1% (n=39)          | 9% (n=2)             | 0.24            |

|                                                                   |                |                |                |                 |
|-------------------------------------------------------------------|----------------|----------------|----------------|-----------------|
| - obesity (data available n=985)                                  | 22% (n=218)    | 21.8% (n=204)  | 22.7% (n=5)    | >0.99           |
| - hypercholesterolemia (data available n=986)                     | 25.6% (n=252)  | 24.7% (n=231)  | 27.2% (n=6)    | 0.80            |
| - family history of cardiovascular disease (data available n=368) | 32.1% (n=118)  | 32.9% (n=107)  | 12.5% (n=2)    | 0.10            |
| <b>baseline EF (± SD)</b>                                         | <b>63 ± 6%</b> | <b>63 ± 6%</b> | <b>63 ± 6%</b> | <b>&gt;0.99</b> |
